# Supplementary material for: Response of Microbial Community Function to Fluctuating Geochemical Conditions within a Legacy Radioactive Waste Trench Environment
Source: PubMed Central journal article supplement (PMC5561297; doi:10.1128/aem.00729-17), 2017-08-17
Supplement: AEM.00729-17_zam999118017s1.pdf [file AEM.00729-17_zam999118017s1.pdf]

## 20 **Results and Discussion**

### 21 **Reactive oxygen species detoxification**

22 The rapid trench water redox cycling involving the production of large quantities of  
23 Fe(II), along with elevated concentrations of organic compounds, creates conditions  
24 conducive to reactive oxygen species production (Page *et al.*, 2013; Minella *et al.*, 2015;  
25 Klüpfel *et al.*, 2014; Page *et al.*, 2012; Tong *et al.*, 2016). Superoxide dismutase (SOD,  
26 SUPEROX-DISMUT-RXN, EC:1.15.1.1) was found to be the predominant RXN related to  
27 reactive oxygen species (ROS) detoxification at all time points, with a maximum at day 47  
28 (Figure 5F). Catalase peaked at day 4 and superoxide reductases (SOR, 1.15.1.2-RXN) at day  
29 47, both exhibiting similar relative abundances at the lowest values (days 0 and 4).

30 The general classic concept of strict anaerobes being unable to cope with O<sub>2</sub> and  
31 reactive oxygen species has been long obsolete (Imlay, 2002). While SODs are well  
32 distributed amongst aerobic and anaerobic organisms, catalases are more commonly found in  
33 aerobes, and SORs in anaerobes (Sheng *et al.*, 2014). This is consistent with the results  
34 presented above.

35 Levels of SOD have been correlated with the aerotolerance of anaerobes (Hassan, 1989;  
36 Tally *et al.*, 1977). Gene copy numbers have been correlated with expression levels for  
37 numerous proteins. The high relative abundance of SOD during the anaerobic phase could  
38 relate to the physiological needs of the anaerobes and aerotolerant microbes thriving in the  
39 trenches to deal with transient high oxygen concentrations (Brioukhanov *et al.*, 2002; Sheng  
40 *et al.*, 2014).

## 41 **References**

42 Brioukhanov AL, Thauer RK, Netrusov AI. (2002). Catalase and superoxide dismutase in the  
43 cells of strictly anaerobic microorganisms. *Microbiology* **71**: 281–285.

- 44 Hassan HM. (1989). Microbial superoxide dismutases. In: Scandalios JG (ed) Vol. 26.  
45 *Advances in Genetics*. Academic Press: New York, NY, pp 65–97.
- 46 Imlay JA. (2002). How oxygen damages microbes: Oxygen tolerance and obligate  
47 anaerobiosis. In: Physiology B-A in M (ed) *Advances in Microbial Physiology* Vol. 46.  
48 Academic Press, pp 111–153.
- 49 Klüpfel L, Piepenbrock A, Kappler A, Sander M. (2014). Humic substances as fully  
50 regenerable electron acceptors in recurrently anoxic environments. *Nat Geosci* **7**: 195–200.
- 51 Minella M, De Laurentiis E, Maurino V, Minero C, Vione D. (2015). Dark production of  
52 hydroxyl radicals by aeration of anoxic lake water. *Sci Total Environ* **527–528**: 322–327.
- 53 Page SE, Kling GW, Sander M, Harrold KH, Logan JR, McNeill K, *et al.* (2013). Dark  
54 formation of hydroxyl radical in arctic soil and surface waters. *Environ Sci Technol* **47**:  
55 12860–12867.
- 56 Page SE, Sander M, Arnold WA, McNeill K. (2012). Hydroxyl radical formation upon  
57 oxidation of reduced humic acids by oxygen in the dark. *Environ Sci Technol* **46**: 1590–1597.
- 58 Sheng Y, Abreu IA, Cabelli DE, Maroney MJ, Miller A-F, Teixeira M, *et al.* (2014).  
59 Superoxide Dismutases and Superoxide Reductases. *Chem Rev* **114**: 3854–3918.
- 60 Tally FP, Goldin BR, Jacobus NV, Gorbach SL. (1977). Superoxide dismutase in anaerobic  
61 bacteria of clinical significance. *Infect Immun* **16**: 20–25.
- 62 Tong M, Yuan S, Ma S, Jin M, Liu D, Cheng D, *et al.* (2016). Production of abundant  
63 hydroxyl radicals from oxygenation of subsurface sediments. *Environ Sci Technol* **50**: 214–  
64 221.
- 65

66 **Supplementary Figures**

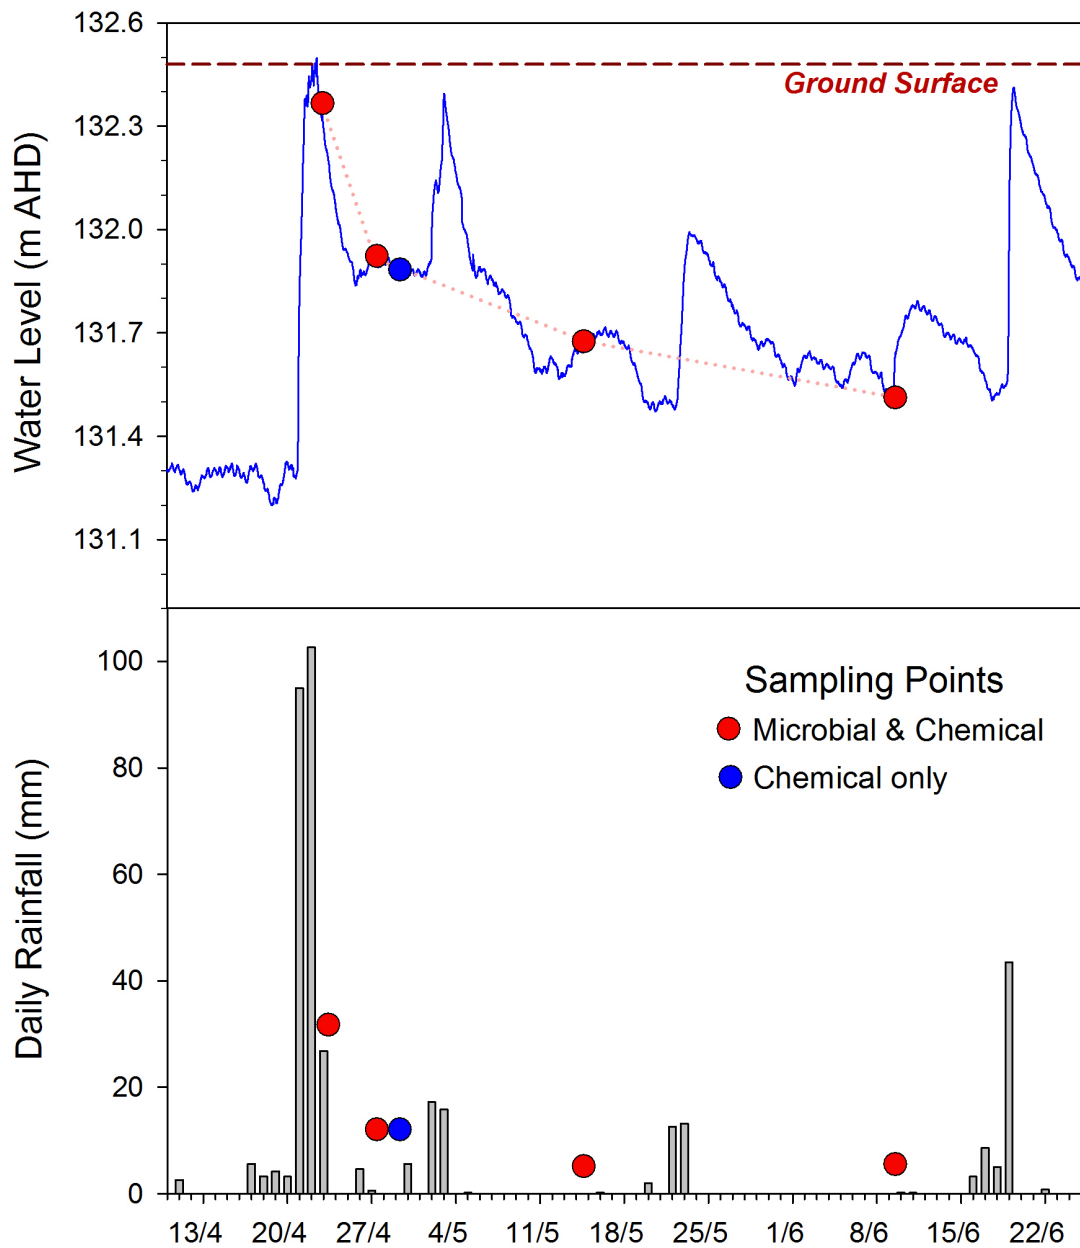

67

68 **Figure S1. Daily rainfall at Lucas Heights (ANSTO) Meteorological Station from April to July**  
 69 **2015 (bottom). Corresponding trench water levels across the sampling period, along with the**  
 70 **ground surface elevation shown by the dashed line (top). Circles depict dates of chemical and**  
 71 **microbial sampling. Rainfall data is courtesy of the Australian Government, Bureau of Meteorology.**

72

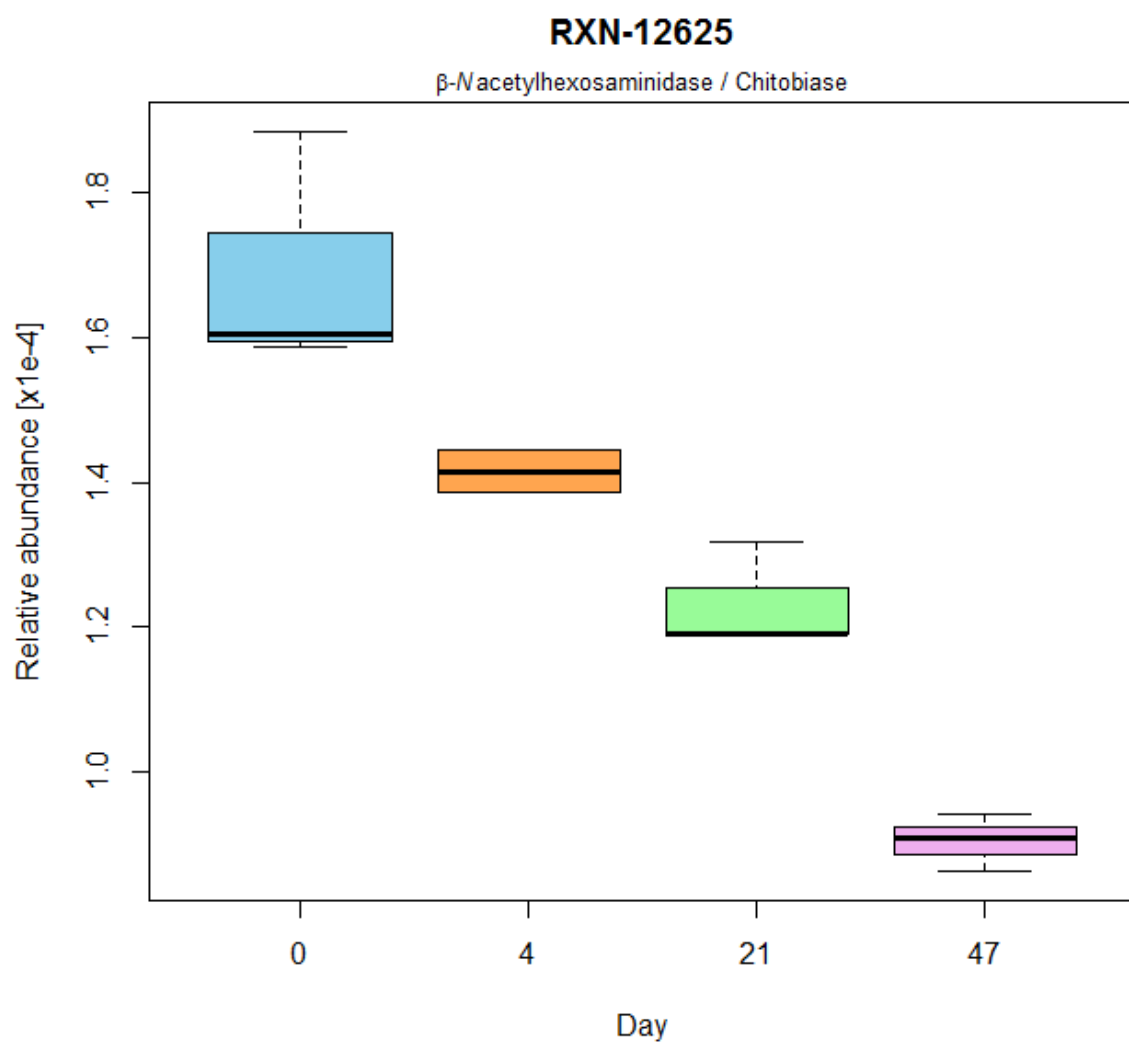

73

74 **Figure S2. Chitobiase.** Marker for the degradation of chitobiose and/or chitin.

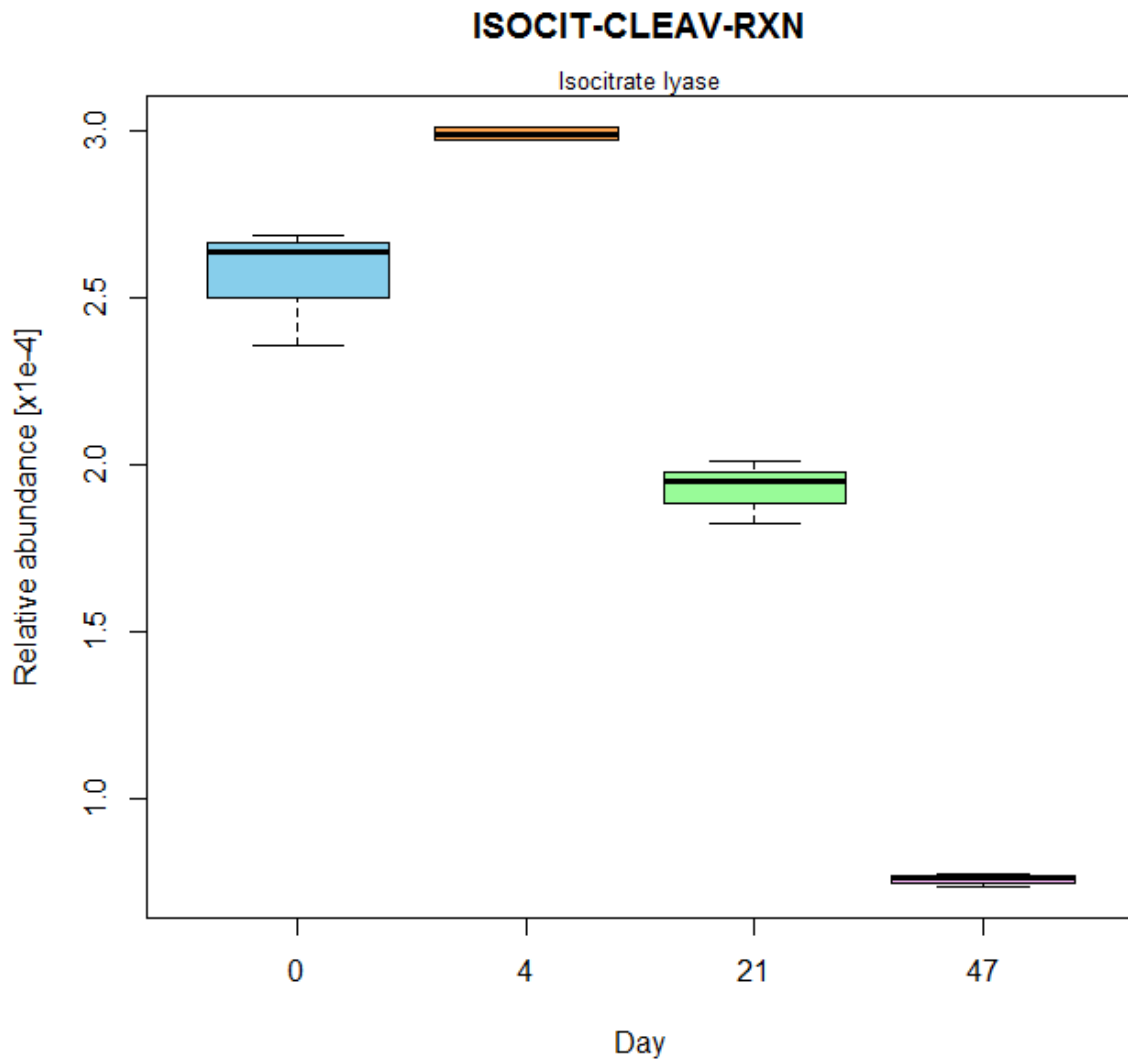

75  
76 **Figure S3. ISOCIT-CLEAV-RXN.** Marker for the glyoxylate pathway.

77

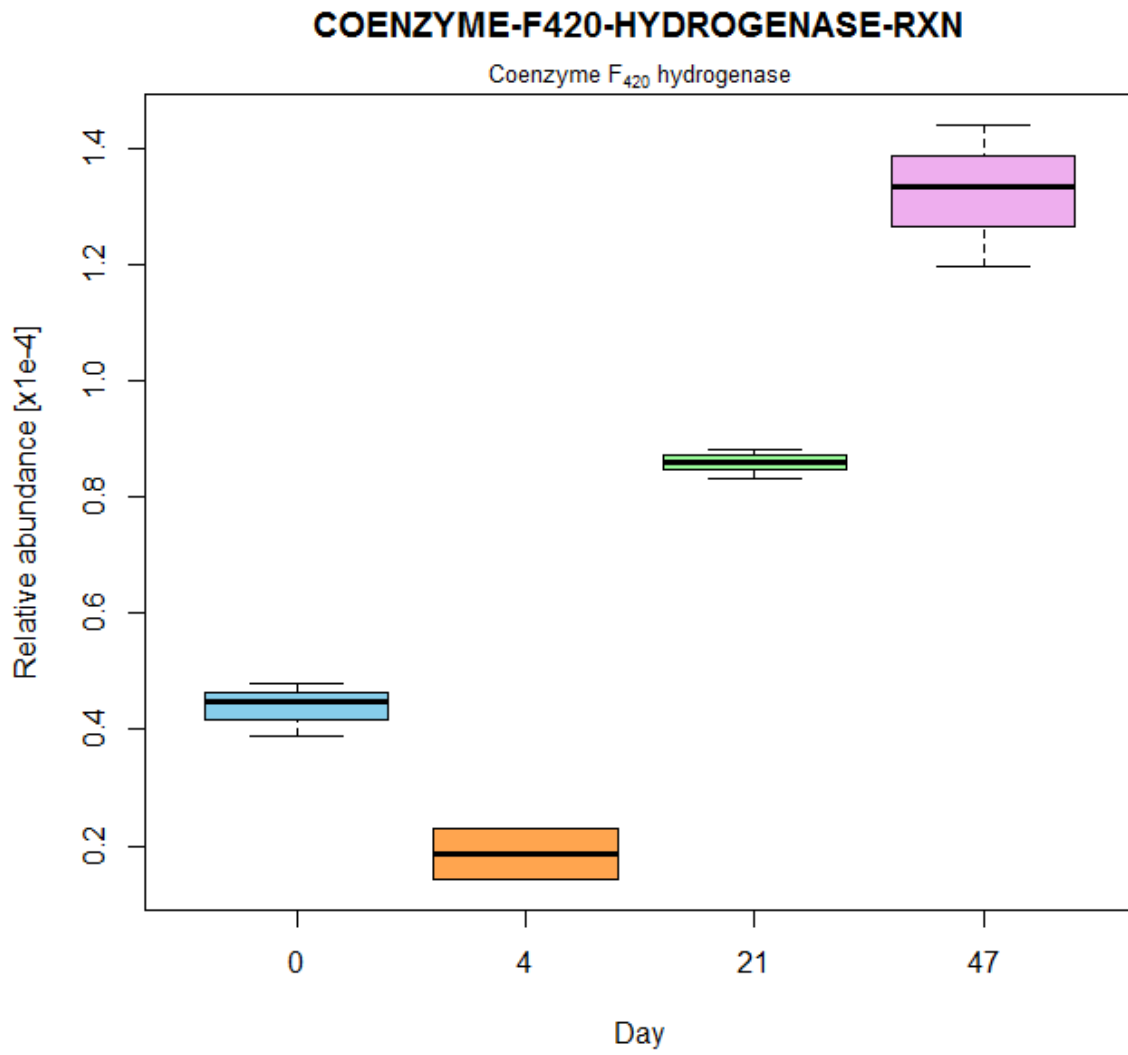

78  
79 **Figure S4. COENZYME-F420-HYDROGENASE-RXN.** Indicator of methanogenesis from H<sub>2</sub> and CO<sub>2</sub>.

80

## SULFITE-DEHYDROGENASE-RXN

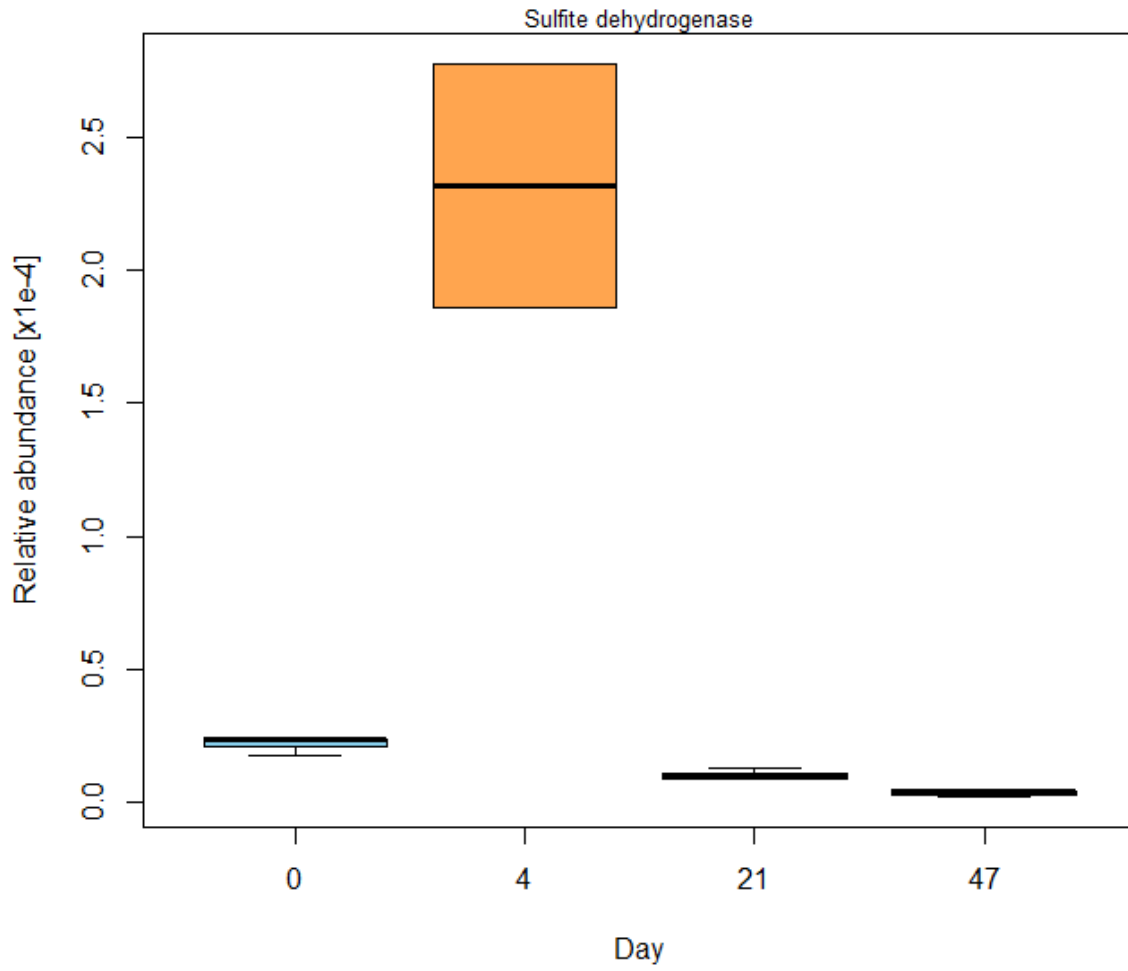

81  
82 **Figure S5. SULFITE-DEHYDROGENASE-RXN (EC:1.8.2.1).** Assimilatory sulfate reduction.

83



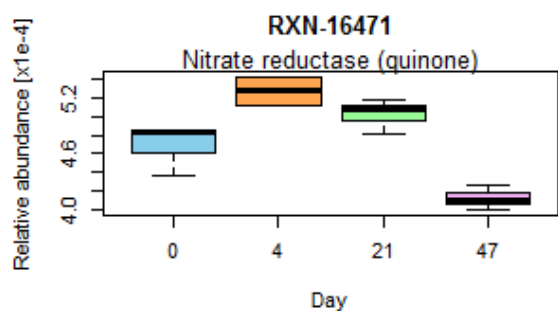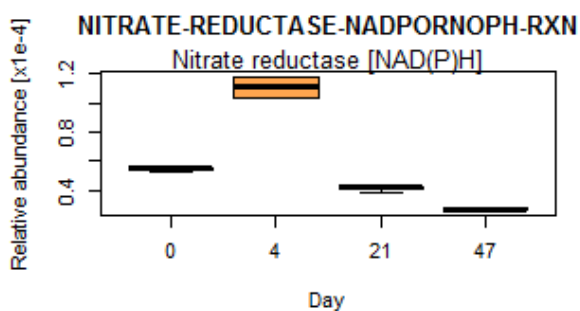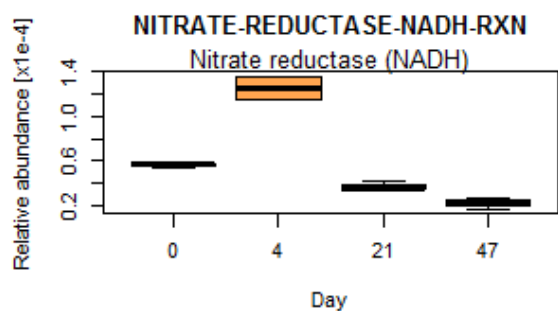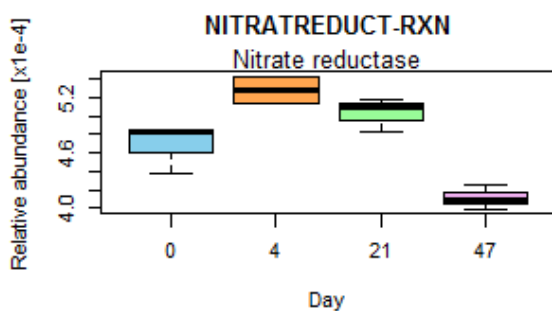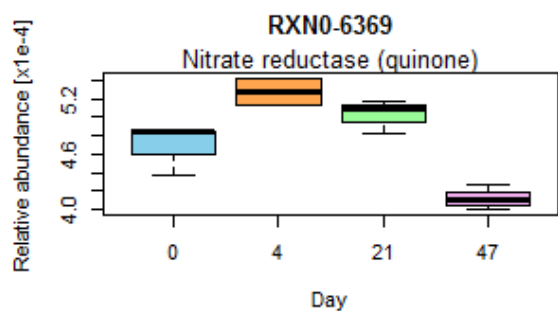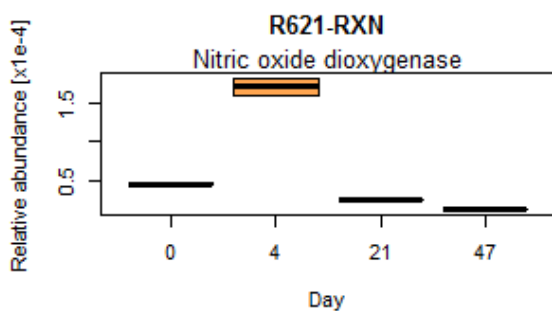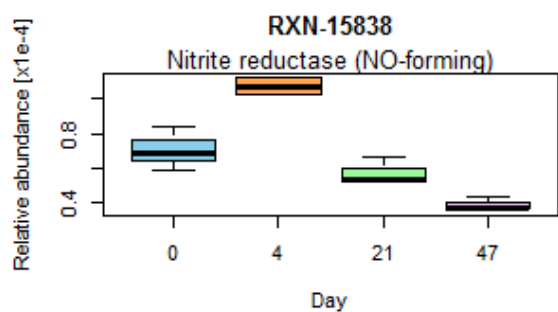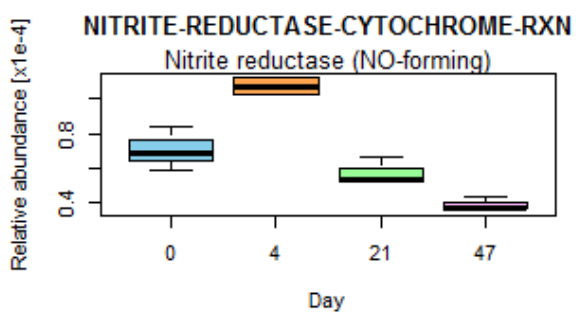

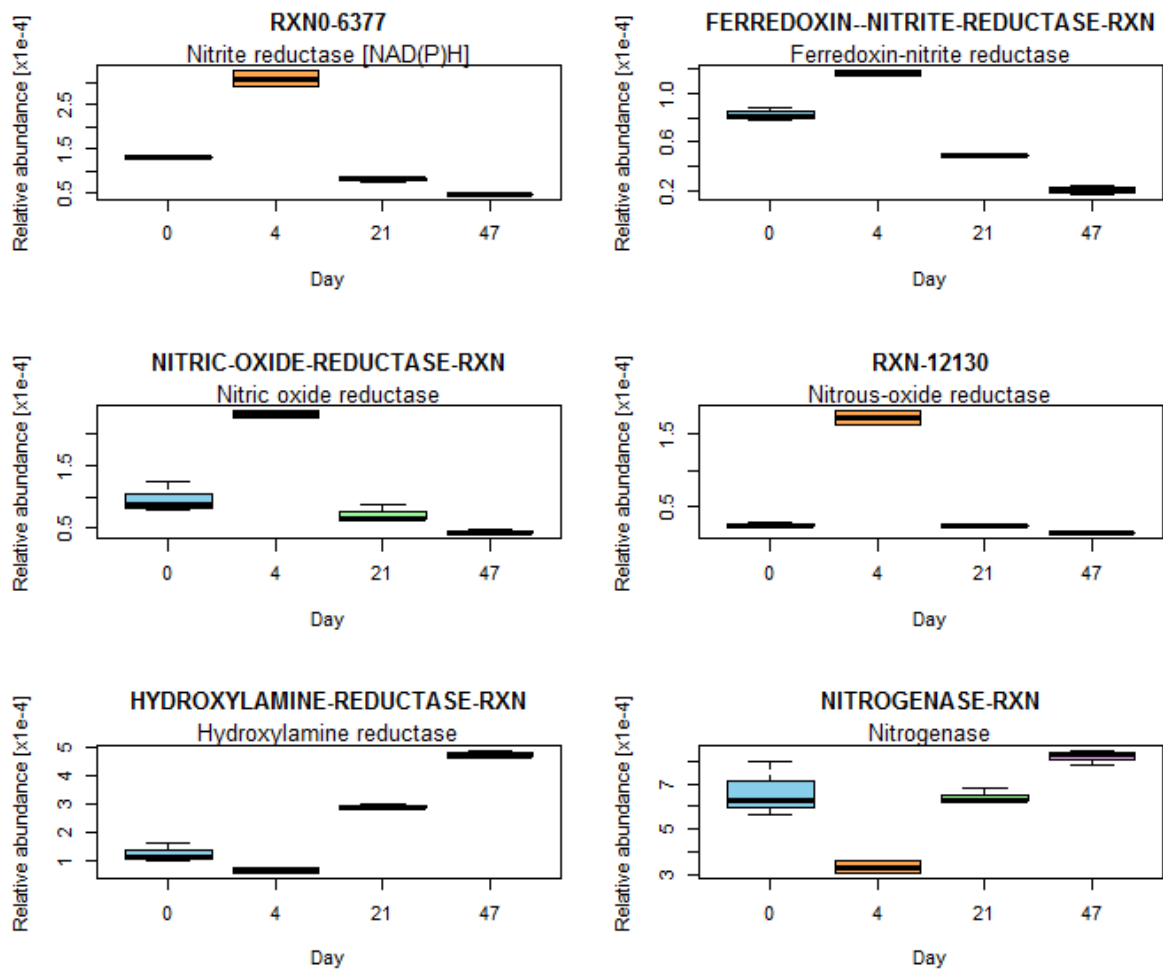

85

86 **Figure S6. Relevant RXNs related to the nitrogen cycle.**

87

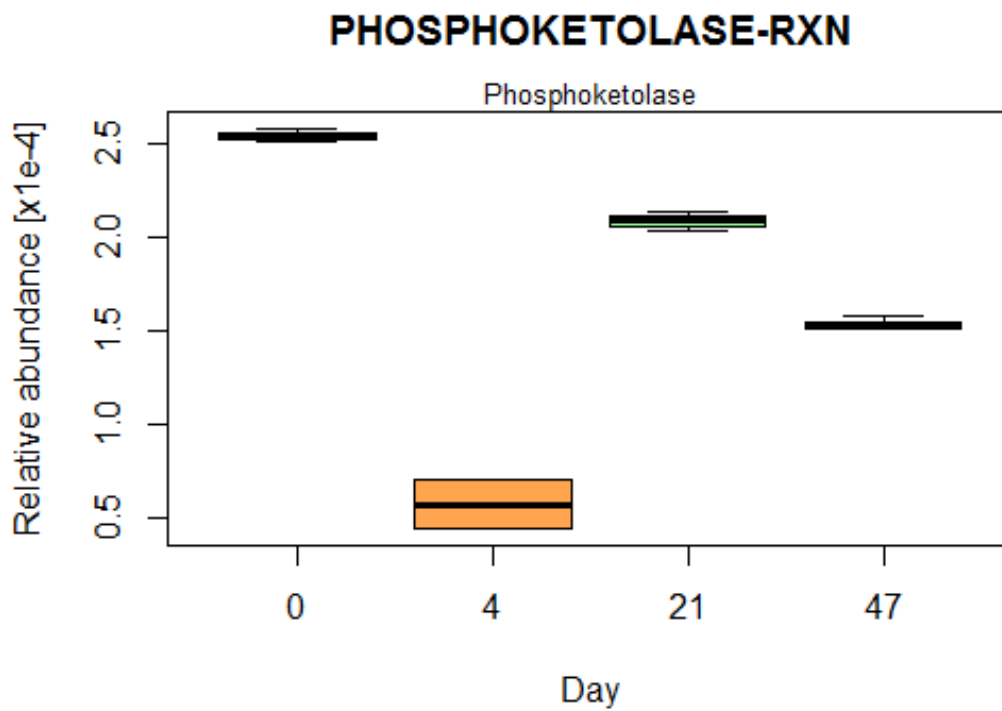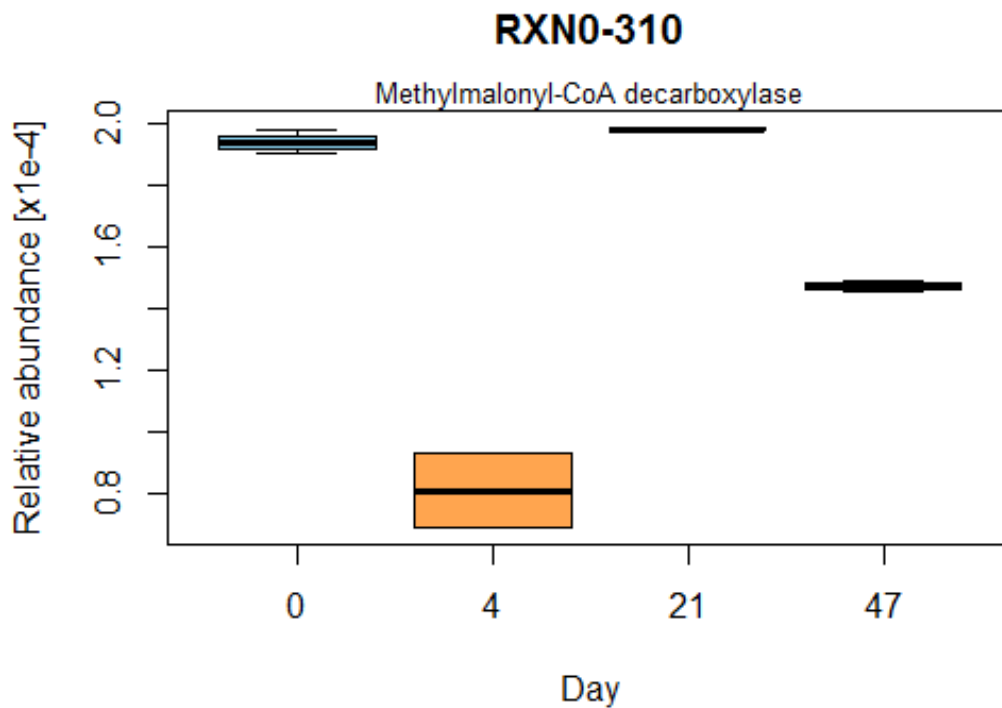

88

89 **Figure S7. PHOSPHOKETOLASE-RXN and RXN0-310.** Markers for heterolactic and propionate  
 90 fermentation respectively.

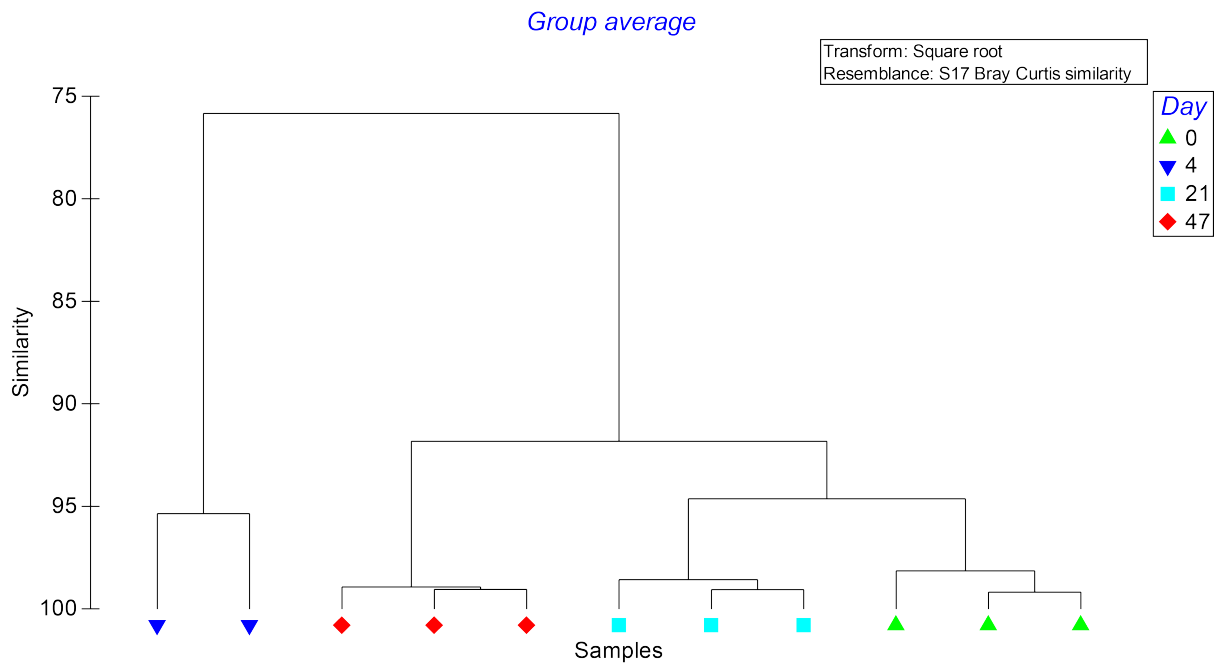

91

92 **Figure S8. Bray-Curtis similarity tree of the functional profiles for the individual sampling**  
 93 **replicates.**

94 **Supplementary Files**

95 Supplementary file 1. Spreadsheet with YSI data.

96 Supplementary file 2. Krona HTML file with the taxonomy.

97 Supplementary file 3. Spreadsheet with the relative abundances of all the RXNs.

98 Supplementary file 4. Table with the raw HUMAnN2 output.

99 All supplementary files can be viewed at: <https://dx.doi.org/10.6084/m9.figshare.3817356>
